# Supplementary material for: An autonomous remotely operated gas chromatograph for chemically resolved monitoring of atmospheric volatile organic compounds
Source: Royal Society of Chemistry journal article supplement (doi:10.1039/d2ea00079b), 2023-01-01
Supplement: d2ea00079b1.pdf [file d2ea00079b1.pdf]

**Table S1.** Composition and pure concentration of the multi-component calibrant. Uncertainty for all values is  $\pm 5\%$ .

| Compound               | Concentration (ppbv) |
|------------------------|----------------------|
| Pentane                | 15.40                |
| Isoprene               | 40.30                |
| Methyl Vinyl Ketone    | 17.50                |
| Hexane                 | 9.96                 |
| Benzene                | 15.00                |
| $\alpha$ -Pinene       | 17.60                |
| 1,3,5-Trimethylbenzene | 12.40                |
| Limonene               | 8.30                 |
| Nopinone               | 8.92                 |
| $\alpha$ -Cedrene      | 4.35                 |
| $\alpha$ -Humulene     | 4.40                 |

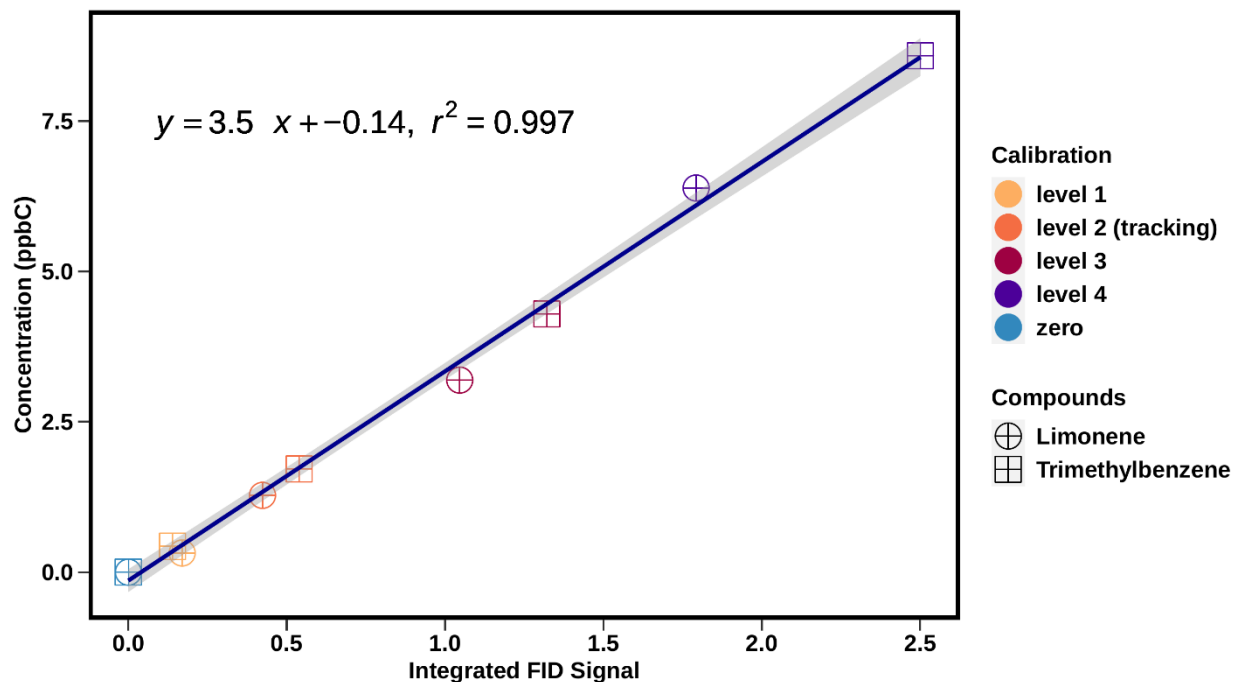

Figure S1. A linear regression plot between the integrated FID signal and the calibrant concentration for one-week of Limonene and TMB calibrations. The shading represents the standard error ( $3.5 \pm 0.07$ ) of the residuals to account for the uncertainty of the slope of the linear regression. Colors represent different calibration levels (i.e., different dilution flows) and symbols represent calibrants.

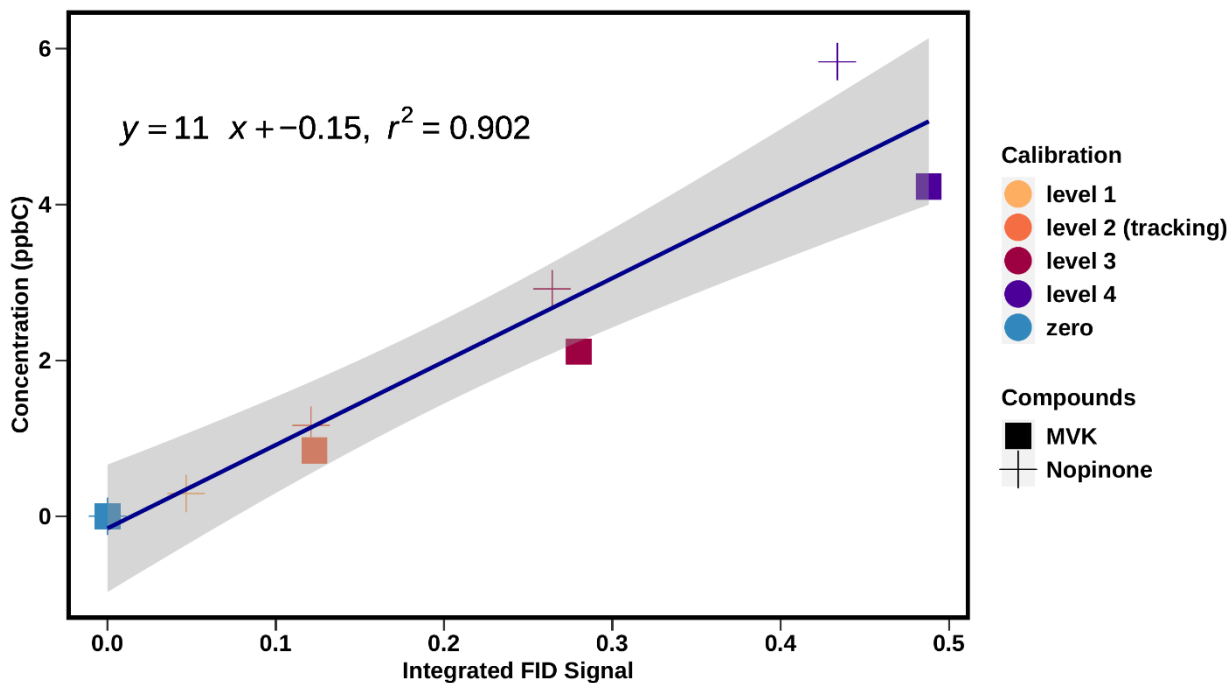

Figure S2. A linear regression plot between the integrated FID signal and the calibrant concentration for one-week of MVK and Nopinone calibrations. The shading represents the standard error ( $11 \pm 1.3$ ) of the residuals to account for the uncertainty of the slope of the linear regression. Colors represent different calibration levels (i.e., different dilution flows) and symbols represent calibrants.
